# Supplementary material for: Psychosocial symptom networks and high-risk sexual behaviors among men who have sex with men: a network analysis
Source: Research Square preprint supplement (doi:10.21203/rs.3.rs-7315885/v1), 2025-09-08
Supplement: Supplementary file 1 [file d133da2ebd1c9358468bd2fe.docx]

**Psychosocial symptom networks and high-risk sexual behaviors among men who have sex with men: a network analysis**

**Additional file**

**Table S1** Questionnaires and items used for the assessment of psychosocial problems

|  | **Reference Name** | **Item** |
| --- | --- | --- |
| **PHQ-9** | Anhedonia | Little interest or pleasure in doing things |
| Sad Mood | Feeling down, depressed, or hopeless |
| Sleep problems | Trouble falling or staying asleep, or sleeping too much |
| Feeling tired | Feeling tired or having little energy |
| Appetite problems | Poor appetite or overeating |
| Feeling guilty | Feeling bad about yourself - or that you are a failure or have let yourself or your family down |
| Trouble concentrating | Trouble concentrating on things, such as reading the newspaper or watching television |
| Psychomotor symptoms | Moving or speaking so slowly that other people could have noticed. Or the opposite - being so fidgety or restless that you have been moving around a lot more than usual |
| Suicidal thoughts | Thoughts that you would be better off dead, or of hurting yourself in some way |
| **GAD-7** | Feeling nervous | Feeling nervous, anxious, or on edge |
| Cannot stop worrying | Not being able to stop or control worrying |
| Worrying too much | Worrying too much about different things |
| Trouble relaxing | Trouble relaxing |
| Restless | Being so restless that it is hard to sit still |
| Irritable | Becoming easily annoyed or irritable |
| Feeling afraid | Feeling afraid as if something awful might happen |
| **UCLA-3** | Lacking companionship | How often do you feel that you lack companionship? |
| Feeling left out | How often do you feel left out? |
| Feeling isolated | How often do you feel isolated from others? |

**Table S1** Questionnaires and items used for the assessment of psychosocial problems (continued)

|  | **Reference Name** | **Item** |
| --- | --- | --- |
| **RSES** | Worth | I feel that I am a person of worth, at least on an equal plane with others |
| Good qualities | I feel that I have a number of good qualities |
| Failure | All in all, I am inclined to feel that I am a failure* |
| Doing things well | I am able to do things as well as most people |
| Proud | I feel I do not have much to be proud of* |
| Positive attitude | I take a positive attitude toward myself |
| Satisfied with myself | On the whole, I am satisfied with myself |
| Respect for myself | I wish I could have more respect for myself* |
| Feeling useless | I certainly feel useless at times* |
| No good | At times I think that I am no good at all* |
| **MSPSS** | MSPSS family subscale | My family really tries to help me |
| I get the emotional help & support I need from my family |
| I can talk about my problems with my family |
| My family is willing to help me make decisions |
| MSPSS friends subscale | My friends really try to help me |
| I can count on my friends when things go wrong |
| I have friends with whom I can share my joys and sorrows |
| I can talk about my problems with my friends |
| MSPSS significant other subscale | There is a special person who is around when I am in need |
| There is a special person with whom I can share joys and sorrows |
| I have a special person who is a real source of comfort to me |
| There is a special person in my life who cares about my feelings |

**Table S1** Questionnaires and items used for the assessment of psychosocial problems (continued)

|  | **Reference Name** | **Item** |
| --- | --- | --- |
| **SOI-R** | SOI-R attitude facet | Sex without love is OK |
| I can imagine myself being comfortable and enjoying "casual" sex with different partners |
| I do not want to have sex with a person until I am sure that we will have a long-term, serious relationship* |
| SOI-R desire facet | How often do you have fantasies about having sex with someone you are not in a committed romantic relationship with? |
| How often do you experience sexual arousal when you are in contact with someone you are not in a committed romantic relationship with? |
| In everyday life, how often do you have spontaneous fantasies about having sex with someone you have just met? |
| **SIHS** | SIHS social comfort with gay men (SC) factor | Obviously effeminate homosexual men make me feel uncomfortable* |
| I feel comfortable in gay bars |
| Social situations with gay men make me feel uncomfortable* |
| SIHS public identification as gay (PUBID) factor | I feel comfortable being seen in public with an obviously gay person |
| I feel comfortable discussing homosexuality in a public situation |
| SIHS personal comfort with a gay identity (PC) factor | I feel comfortable being a homosexual man |
| Homosexuality is morally acceptable to me |
| Even if I could change my sexual orientation, I wouldn’t |

PHQ-9: Patient Health Questionnaire-9; GAD-7: Generalized Anxiety Disorder-7; UCLA-3: UCLA 3-Item Loneliness Scale; RSES: Rosenberg Self-Esteem Scale; MSPSS: Multidimensional Scale of Perceived Social Support; SOI-R: Revised Sociosexual Orientation Inventory; SIHS: Short Internalized Homonegativity Scale

* Reversed-coded item

**Table S2** Estimated edge weights of the network

|  | | Anhedonia | Sad Mood | Sleep problems | Feeling tired | Appetite problems | Feeling guilty | Trouble concentrating | Psychomotor symptoms | Suicidal thoughts | Feeling nervous | Cannot stop worrying | Worrying too much | Trouble relaxing | Restless | Irritable | Feeling afraid | Lacking companionship | Feeling left out |
| --- | --- | --- | --- | --- | --- | --- | --- | --- | --- | --- | --- | --- | --- | --- | --- | --- | --- | --- | --- |
| Anhedonia | NA | 0.26 | 0.08 | 0.12 | NA | NA | 0.12 | NA | NA | 0.23 | NA | 0.09 | NA | NA | NA | NA | NA | NA |
| Sad Mood | 0.26 | NA | 0.12 | 0.08 | NA | 0.10 | NA | 0.09 | 0.07 | NA | NA | NA | NA | 0.05 | 0.05 | NA | NA | 0.05 |
| Sleep problems | 0.08 | 0.12 | NA | 0.21 | NA | NA | NA | NA | NA | NA | 0.11 | NA | NA | NA | NA | 0.05 | NA | NA |
| Feeling tired | 0.12 | 0.08 | 0.21 | NA | 0.13 | NA | 0.07 | NA | NA | NA | 0.05 | 0.06 | NA | NA | 0.16 | NA | NA | NA |
| Appetite problems | NA | NA | NA | 0.13 | NA | 0.15 | 0.10 | 0.11 | NA | 0.05 | NA | NA | NA | NA | NA | NA | NA | NA |
| Feeling guilty | NA | 0.10 | NA | NA | 0.15 | NA | 0.12 | 0.09 | 0.10 | 0.08 | NA | NA | 0.13 | 0.09 | NA | NA | NA | NA |
| Trouble concentrating | 0.12 | NA | NA | 0.07 | 0.10 | 0.12 | NA | 0.16 | 0.02 | NA | 0.05 | NA | 0.05 | 0.08 | NA | 0.07 | NA | NA |
| Psychomotor symptoms | NA | 0.09 | NA | NA | 0.11 | 0.09 | 0.16 | NA | 0.16 | NA | 0.07 | NA | NA | 0.10 | NA | NA | NA | NA |
| Suicidal thoughts | NA | 0.07 | NA | NA | NA | 0.10 | NA | 0.16 | NA | NA | 0.06 | NA | NA | NA | NA | 0.13 | NA | NA |
| Feeling nervous | 0.23 | NA | NA | NA | 0.05 | 0.08 | NA | NA | NA | NA | 0.26 | 0.13 | NA | 0.07 | 0.09 | NA | 0.09 | NA |
| Cannot stop worrying | NA | NA | 0.11 | 0.05 | NA | NA | 0.05 | 0.07 | 0.06 | 0.26 | NA | 0.10 | NA | 0.15 | 0.12 | NA | NA | NA |
| Worrying too much | 0.09 | NA | NA | 0.06 | NA | NA | NA | NA | NA | 0.13 | 0.10 | NA | 0.20 | NA | 0.12 | 0.05 | NA | NA |
| Trouble relaxing | NA | NA | NA | NA | NA | 0.13 | 0.05 | NA | NA | NA | NA | 0.20 | NA | 0.16 | 0.08 | 0.12 | NA | NA |
| Restless | NA | 0.05 | NA | NA | NA | 0.09 | 0.08 | 0.10 | NA | 0.07 | 0.15 | NA | 0.16 | NA | NA | 0.19 | NA | NA |
| Irritable | NA | 0.05 | NA | 0.16 | NA | NA | NA | NA | NA | 0.09 | 0.12 | 0.12 | 0.08 | NA | NA | 0.12 | NA | NA |
| Feeling afraid | NA | NA | 0.05 | NA | NA | NA | 0.07 | NA | 0.13 | NA | NA | 0.05 | 0.12 | 0.19 | 0.12 | NA | NA | NA |
| Lacking companionship | NA | NA | NA | NA | NA | NA | NA | NA | NA | 0.09 | NA | NA | NA | NA | NA | NA | NA | 0.26 |
| Feeling left out | NA | 0.05 | NA | NA | NA | NA | NA | NA | NA | NA | NA | NA | NA | NA | NA | NA | 0.26 | NA |
| Feeling isolated | NA | NA | NA | NA | NA | NA | NA | NA | NA | NA | NA | NA | NA | NA | NA | NA | 0.27 | 0.45 |
| Worth | NA | NA | NA | NA | NA | NA | NA | NA | NA | NA | NA | NA | NA | NA | NA | NA | NA | NA |

**Table S2** Estimated edge weights of the network (continued)

|  | Anhedonia | | Sad Mood | | Sleep problems | | Feeling tired | | Appetite problems | | Feeling guilty | | Trouble concentrating | | Psychomotor symptoms | | Suicidal thoughts | | Feeling nervous | | Cannot stop worrying | | Worrying too much | | Trouble relaxing | | Restless | | Irritable | | Feeling afraid | | Lacking companionship | | Feeling left out | |
| --- | --- | --- | --- | --- | --- | --- | --- | --- | --- | --- | --- | --- | --- | --- | --- | --- | --- | --- | --- | --- | --- | --- | --- | --- | --- | --- | --- | --- | --- | --- | --- | --- | --- | --- | --- | --- |
| Good qualities | | NA | | NA | | NA | | NA | | NA | | NA | | NA | | NA | | NA | | NA | | NA | | NA | | NA | | NA | | NA | | NA | | NA | | NA |
| Failure | | NA | | NA | | NA | | NA | | NA | | NA | | NA | | NA | | NA | | NA | | NA | | NA | | NA | | NA | | NA | | -0.05 | | NA | | NA |
| Doing things well | | NA | | NA | | NA | | NA | | NA | | NA | | NA | | NA | | NA | | NA | | NA | | NA | | NA | | NA | | NA | | NA | | NA | | NA |
| Proud | | NA | | NA | | NA | | NA | | NA | | NA | | NA | | NA | | NA | | NA | | NA | | NA | | NA | | NA | | NA | | NA | | NA | | NA |
| Positive attitude | | NA | | NA | | NA | | NA | | NA | | NA | | NA | | NA | | NA | | NA | | NA | | NA | | NA | | NA | | NA | | NA | | NA | | NA |
| Satisfied with myself | | NA | | NA | | NA | | NA | | NA | | NA | | NA | | NA | | NA | | NA | | NA | | NA | | NA | | NA | | NA | | NA | | NA | | NA |
| Respect for myself | | NA | | -0.05 | | NA | | NA | | NA | | NA | | NA | | NA | | NA | | NA | | NA | | -0.06 | | NA | | -0.05 | | NA | | NA | | NA | | NA |
| Feeling useless | | NA | | NA | | NA | | NA | | NA | | NA | | NA | | NA | | NA | | NA | | NA | | NA | | NA | | NA | | NA | | NA | | NA | | NA |
| No good | | NA | | NA | | NA | | NA | | NA | | NA | | NA | | NA | | NA | | NA | | NA | | NA | | NA | | NA | | NA | | NA | | NA | | NA |
| MSPSS family subscale | | NA | | NA | | NA | | NA | | NA | | NA | | NA | | NA | | NA | | NA | | NA | | NA | | NA | | NA | | NA | | NA | | NA | | NA |
| MSPSS friends subscale | | NA | | NA | | NA | | NA | | NA | | NA | | NA | | NA | | NA | | NA | | NA | | NA | | NA | | NA | | NA | | NA | | NA | | NA |
| MSPSS significant other subscale | | NA | | NA | | NA | | NA | | NA | | NA | | NA | | NA | | NA | | NA | | NA | | NA | | NA | | NA | | NA | | NA | | NA | | -0.07 |
| SOI-R attitude facet | | 0.06 | | NA | | NA | | NA | | NA | | NA | | NA | | NA | | -0.05 | | 0.07 | | NA | | NA | | NA | | NA | | NA | | NA | | NA | | NA |
| SOI-R desire facet | | NA | | NA | | NA | | -0.09 | | NA | | NA | | NA | | NA | | NA | | 0.06 | | NA | | NA | | NA | | NA | | NA | | NA | | 0.25 | | NA |
| SIHS social comfort with gay men (SC) factor | | NA | | NA | | NA | | NA | | NA | | -0.07 | | NA | | NA | | NA | | NA | | NA | | NA | | 0.07 | | NA | | NA | | NA | | NA | | NA |
| SIHS public identification as gay (PUBID) factor | | NA | | NA | | NA | | NA | | NA | | NA | | NA | | NA | | NA | | NA | | 0.01 | | NA | | 0.05 | | NA | | 0.07 | | NA | | NA | | NA |
| SIHS personal comfort with a gay identity (PC) factor | | NA | | NA | | NA | | 0.09 | | NA | | NA | | NA | | NA | | NA | | NA | | NA | | NA | | NA | | NA | | NA | | NA | | NA | | NA |

**Table S2** Estimated edge weights of the network (continued)

|  | | Feeling isolated | | Good qualities | | Failure | | Doing things well | | Proud | | Positive attitude | | Satisfied with myself | | Respect for myself | | Feeling useless | | No good | | MSPSS family subscale | | MSPSS friends subscale | | MSPSS significant other subscale | | SOI-R attitude facet | | SOI-R desire facet | | SIHS social comfort with gay men (SC) factor | | SIHS public identification as gay (PUBID) factor | | SIHS personal comfort with a gay identity (PC) factor | |
| --- | --- | --- | --- | --- | --- | --- | --- | --- | --- | --- | --- | --- | --- | --- | --- | --- | --- | --- | --- | --- | --- | --- | --- | --- | --- | --- | --- | --- | --- | --- | --- | --- | --- | --- | --- | --- | --- |
| Anhedonia | | NA | | NA | | NA | | NA | | NA | | NA | | NA | | NA | | NA | | NA | | NA | | NA | | NA | | 0.06 | | NA | | NA | | NA | | NA | |
| Sad Mood | | NA | | NA | | NA | | NA | | NA | | NA | | NA | | -0.05 | | NA | | NA | | NA | | NA | | NA | | NA | | NA | | NA | | NA | | NA | |
| Sleep problems | | NA | | NA | | NA | | NA | | NA | | NA | | NA | | NA | | NA | | NA | | NA | | NA | | NA | | NA | | NA | | NA | | NA | | NA | |
| Feeling tired | | NA | | NA | | NA | | NA | | NA | | NA | | NA | | NA | | NA | | NA | | NA | | NA | | NA | | NA | | -0.09 | | NA | | NA | | 0.09 | |
| Appetite problems | | NA | | NA | | NA | | NA | | NA | | NA | | NA | | NA | | NA | | NA | | NA | | NA | | NA | | NA | | NA | | NA | | NA | | NA | |
| Feeling guilty | | NA | | NA | | NA | | NA | | NA | | NA | | NA | | NA | | NA | | NA | | NA | | NA | | NA | | NA | | NA | | -0.07 | | NA | | NA | |
| Trouble concentrating | | NA | | NA | | NA | | NA | | NA | | NA | | NA | | NA | | NA | | NA | | NA | | NA | | NA | | NA | | NA | | NA | | NA | | NA | |
| Psychomotor symptoms | | NA | | NA | | NA | | NA | | NA | | NA | | NA | | NA | | NA | | NA | | NA | | NA | | NA | | NA | | NA | | NA | | NA | | NA | |
| Suicidal thoughts | | NA | | NA | | NA | | NA | | NA | | NA | | NA | | NA | | NA | | NA | | NA | | NA | | NA | | -0.05 | | NA | | NA | | NA | | NA | |
| Feeling nervous | | NA | | NA | | NA | | NA | | NA | | NA | | NA | | NA | | NA | | NA | | NA | | NA | | NA | | 0.07 | | 0.06 | | NA | | NA | | NA | |
| Cannot stop worrying | | NA | | NA | | NA | | NA | | NA | | NA | | NA | | NA | | NA | | NA | | NA | | NA | | NA | | NA | | NA | | NA | | NA | | NA | |
| Worrying too much | | NA | | NA | | NA | | NA | | NA | | NA | | NA | | -0.06 | | NA | | NA | | NA | | NA | | NA | | NA | | NA | | NA | | NA | | NA | |
| Trouble relaxing | | NA | | NA | | NA | | NA | | NA | | NA | | NA | | NA | | NA | | NA | | NA | | NA | | NA | | NA | | NA | | 0.07 | | 0.05 | | NA | |
| Restless | | NA | | NA | | NA | | NA | | NA | | NA | | NA | | -0.05 | | NA | | NA | | NA | | NA | | NA | | NA | | NA | | NA | | NA | | NA | |
| Irritable | | NA | | NA | | NA | | NA | | NA | | NA | | NA | | NA | | NA | | NA | | NA | | NA | | NA | | NA | | NA | | NA | | 0.07 | | NA | |
| Feeling afraid | | NA | | NA | | NA | | -0.05 | | NA | | NA | | NA | | NA | | NA | | NA | | NA | | NA | | NA | | NA | | NA | | NA | | NA | | NA | |
| Lacking companionship | | 0.27 | | NA | | NA | | NA | | NA | | NA | | NA | | NA | | NA | | NA | | NA | | NA | | NA | | NA | | 0.25 | | NA | | NA | | NA | |
| Feeling left out | | 0.45 | | NA | | NA | | NA | | NA | | NA | | NA | | NA | | NA | | NA | | NA | | NA | | -0.07 | | NA | | NA | | NA | | NA | | NA | |
| Feeling isolated | | NA | | NA | | NA | | NA | | NA | | NA | | -0.06 | | NA | | NA | | NA | | NA | | NA | | NA | | NA | | NA | | NA | | NA | | NA | |
| Worth | | NA | | NA | | 0.51 | | NA | | 0.06 | | 0.10 | | NA | | NA | | NA | | NA | | 0.05 | | NA | | NA | | NA | | NA | | NA | | NA | | NA | |

**Table S2** Estimated edge weights of the network (continued)

|  | | Feeling isolated | | Good qualities | | Failure | | Doing things well | | Proud | | Positive attitude | | Satisfied with myself | | Respect for myself | | Feeling useless | | No good | | MSPSS family subscale | | MSPSS friends subscale | | MSPSS significant other subscale | | SOI-R attitude facet | | SOI-R desire facet | | SIHS social comfort with gay men (SC) factor | | SIHS public identification as gay (PUBID) factor | | SIHS personal comfort with a gay identity (PC) factor | |
| --- | --- | --- | --- | --- | --- | --- | --- | --- | --- | --- | --- | --- | --- | --- | --- | --- | --- | --- | --- | --- | --- | --- | --- | --- | --- | --- | --- | --- | --- | --- | --- | --- | --- | --- | --- | --- | --- |
| Good qualities | | NA | | 0.51 | | NA | | NA | | NA | | 0.08 | | 0.11 | | NA | | NA | | 0.05 | | NA | | 0.05 | | NA | | NA | | NA | | NA | | NA | | NA |
| Failure | | NA | | NA | | NA | | NA | | 0.25 | | NA | | 0.06 | | NA | | 0.05 | | 0.29 | | NA | | NA | | NA | | NA | | NA | | NA | | NA | | NA |
| Doing things well | | NA | | 0.09 | | 0.29 | | NA | | 0.05 | | 0.28 | | 0.05 | | NA | | NA | | NA | | NA | | NA | | NA | | NA | | NA | | NA | | NA | | NA |
| Proud | | NA | | 0.06 | | NA | | 0.25 | | NA | | NA | | NA | | 0.11 | | 0.05 | | 0.08 | | NA | | 0.06 | | NA | | NA | | NA | | NA | | NA | | NA |
| Positive attitude | | NA | | 0.10 | | 0.08 | | NA | | NA | | NA | | 0.35 | | NA | | 0.06 | | NA | | NA | | NA | | 0.05 | | NA | | NA | | NA | | NA | | NA |
| Satisfied with myself | | -0.06 | | NA | | 0.11 | | 0.06 | | NA | | 0.35 | | NA | | NA | | NA | | NA | | NA | | 0.05 | | 0.07 | | NA | | -0.10 | | NA | | NA | | NA |
| Respect for myself | | NA | | NA | | NA | | NA | | 0.11 | | NA | | NA | | NA | | 0.15 | | NA | | NA | | NA | | NA | | -0.10 | | NA | | -0.11 | | NA | | NA |
| Feeling useless | | NA | | NA | | NA | | 0.05 | | 0.05 | | 0.06 | | NA | | 0.15 | | NA | | 0.66 | | NA | | NA | | NA | | NA | | NA | | NA | | NA | | NA |
| No good | | NA | | NA | | 0.05 | | 0.29 | | 0.08 | | NA | | NA | | NA | | 0.66 | | NA | | NA | | NA | | NA | | NA | | 0.07 | | NA | | NA | | NA |
| MSPSS family subscale | | NA | | 0.05 | | NA | | NA | | NA | | NA | | NA | | NA | | NA | | NA | | NA | | 0.36 | | 0.41 | | NA | | NA | | NA | | 0.05 | | 0.08 |
| MSPSS friends subscale | | NA | | NA | | 0.05 | | NA | | 0.06 | | NA | | 0.05 | | NA | | NA | | NA | | 0.36 | | NA | | 0.36 | | -0.06 | | NA | | NA | | NA | | NA |
| MSPSS significant other subscale | | NA | | NA | | NA | | NA | | NA | | 0.05 | | 0.07 | | NA | | NA | | NA | | 0.41 | | 0.36 | | NA | | NA | | -0.07 | | NA | | NA | | NA |
| SOI-R attitude facet | | NA | | NA | | NA | | NA | | NA | | NA | | NA | | -0.10 | | NA | | NA | | NA | | -0.06 | | NA | | NA | | 0.41 | | NA | | 0.11 | | NA |
| SOI-R desire facet | | NA | | NA | | NA | | NA | | NA | | NA | | -0.10 | | NA | | NA | | 0.07 | | NA | | NA | | -0.07 | | 0.41 | | NA | | -0.12 | | NA | | NA |
| SIHS social comfort with gay men (SC) factor | | NA | | NA | | NA | | NA | | NA | | NA | | NA | | -0.11 | | NA | | NA | | NA | | NA | | NA | | NA | | -0.12 | | NA | | NA | | 0.08 |
| SIHS public identification as gay (PUBID) factor | | NA | | NA | | NA | | NA | | NA | | NA | | NA | | NA | | NA | | NA | | 0.05 | | NA | | NA | | 0.11 | | NA | | NA | | NA | | 0.46 |
| SIHS personal comfort with a gay identity (PC) factor | | NA | | NA | | NA | | NA | | NA | | NA | | NA | | NA | | NA | | NA | | 0.08 | | NA | | NA | | NA | | NA | | 0.08 | | 0.46 | | NA |

**Table S3** Connection value of each node.

| Nodes | Total sample | Age <33 years | Age ≥33 years |
| --- | --- | --- | --- |
| Anhedonia | -0.25 | -0.31 | -0.20 |
| Sad Mood | -0.23 | -0.31 | -0.14 |
| Sleep problems | -0.29 | -0.31 | -0.28 |
| Feeling tired | -0.32 | -0.31 | -0.33 |
| Appetite problems | -0.16 | -0.26 | -0.05 |
| Feeling guilty | -0.20 | -0.27 | -0.14 |
| Trouble concentrating | -0.18 | -0.28 | -0.08 |
| Psychomotor symptoms | -0.13 | -0.21 | -0.06 |
| Suicidal thoughts | -0.14 | -0.11 | -0.18 |
| Feeling nervous | -0.24 | -0.28 | -0.19 |
| Cannot stop worrying | -0.24 | -0.29 | -0.19 |
| Worrying too much | -0.24 | -0.23 | -0.26 |
| Trouble relaxing | -0.29 | -0.28 | -0.29 |
| Restless | -0.21 | -0.23 | -0.20 |
| Irritable | -0.26 | -0.19 | -0.33 |
| Feeling afraid | -0.22 | -0.24 | -0.20 |
| Lacking companionship | 0.04 | -0.03 | 0.12 |
| Feeling left out | 0.05 | -0.14 | 0.24 |
| Feeling isolated | 0.07 | -0.12 | 0.27 |
| Worth | -0.08 | -0.04 | -0.13 |
| Good qualities | -0.12 | -0.08 | -0.15 |
| Failure | -0.09 | 0.01 | -0.19 |
| Doing things well | -0.07 | 0.00 | -0.16 |
| Proud | -0.09 | -0.01 | -0.19 |
| Positive attitude | -0.07 | -0.02 | -0.12 |
| Satisfied with myself | -0.11 | -0.02 | -0.21 |
| Respect for myself | 0.11 | 0.01 | 0.22 |
| Feeling useless | -0.03 | 0.00 | -0.07 |
| No good | -0.05 | -0.04 | -0.06 |
| MSPSS family subscale | -0.27 | -0.18 | -0.34 |
| MSPSS friends subscale | -0.34 | -0.22 | -0.45 |
| MSPSS significant other subscale | -0.32 | -0.20 | -0.41 |
| SOI-R attitude facet | 0.12 | 0.03 | 0.22 |
| SOI-R desire facet | 0.34 | 0.23 | 0.49 |
| SIHS social comfort with gay men (SC) factor | -0.07 | 0.04 | -0.19 |
| SIHS public identification as gay (PUBID) factor | -0.24 | -0.24 | -0.24 |
| SIHS personal comfort with a gay identity (PC) factor | -0.20 | -0.24 | -0.15 |

Connection value was determined by computing Spearman’s correlation between each node and risky sexual behaviors.


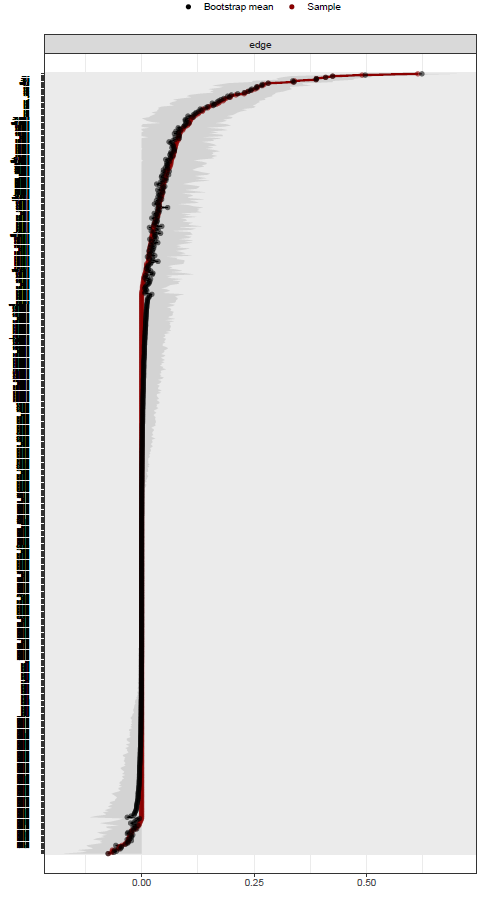


**Figure S1** Stability of edge weights

The x-axle indicates the edge weights and the y-axle indicates the nodes linked by the edges. The black dots denote the mean value of the bootstrapped edge weights and the red dots denote the edge weights from current sample. The black lines denote the 95% confidence intervals of the bootstrapped sample.
